# Supplementary material for: Tuning nanophase separation and drug delivery kinetics through spray drying and self-assembly
Source: Royal Society of Chemistry journal article supplement (doi:10.1039/b9nj00773c), 2010-01-01

## Electronic Supplementary Information - ESI

### Tuning nano-phase separation and drug delivery kinetics through spray-drying and self-assembly

Mohamed Fatnassi, Corine Tourné-Péteilh, Thomas Cacciaguerra, Philippe Dieudonné, Jean-Marie Devoisselle and Bruno Alonso

\* \* \*

#### Contents

- ESI 1. Supplementary characterisation data.
- ESI 2. SEM observations.
- ESI 3. Variation of  $d_{corr}$  as a function of  $r_{ibu/tw}$ .
- ESI 4. TEM analysis.

### ESI 1. Supplementary characterisation data

| <i>Sample</i>                                   | <b>A</b> | <b>B</b>               | <b>C</b> |
|-------------------------------------------------|----------|------------------------|----------|
| <b><i>Synthesis</i></b>                         |          |                        |          |
| ibuprofen (mg/g SiO <sub>2</sub> ) <sup>a</sup> | 156      | 286                    | 156      |
| $r_{ibu/tw}$                                    | 2.0      | 5.0                    | ∞        |
| organic volume fraction $\phi_{org}$            | 0.55     | 0.55                   | 0.25     |
| <b><i>Morphology</i></b>                        |          |                        |          |
| $D_{GM}$ (μm)                                   | 2.0      | 1.5                    | 1.4      |
| <b><i>Release properties</i></b>                |          |                        |          |
| $Q_0$ (%)                                       | 60       | 59                     | 48       |
| $b$                                             | 0.85     | 1.50                   | 2.60     |
| $t_{lag}$ (min)                                 | 0.8      | 2.2                    | 8.5      |
| $t_{scale}$ (min)                               | 8        | 118                    | 6483     |
| $r^2$                                           | 0.999    | 0.998                  | 0.998    |
| <b><i>Texture</i></b>                           |          |                        |          |
| $d_{corr}$ (nm) from SAXS                       | 7.0      | 9.5                    | -        |
| $d_{corr}$ (nm) from TEM                        | 6.8      | 9.0                    | -        |
| spheroid domains (nm) <sup>b</sup>              | -        | 20-100                 | 20-100   |
| <b><sup>13</sup>C NMR -COOH peak</b>            |          |                        |          |
|                                                 | Broad    | Broad, 78% / Thin, 22% | Thin     |
| $\delta_{iso}$ (ppm)                            | 178.9    | 180.2 / 181.3          | 181.4    |
| $\Delta\nu_{1/2}$ (Hz)                          | 158      | 157 / 24               | 32       |

a: amount of ibuprofen introduced in the sol over the amount of SiO<sub>2</sub> formed after condensation.

b: estimated by TEM, see ESI 4.

## ESI 2. SEM observations.

Examples of morphology (SEM micrographs and statistical analyses) observed for three samples **A**, **B**, and **C**. Size distributions were obtained by counting the number of spheres (well-separated or slightly agglomerated), and were fitted using a Log-Normal distribution.

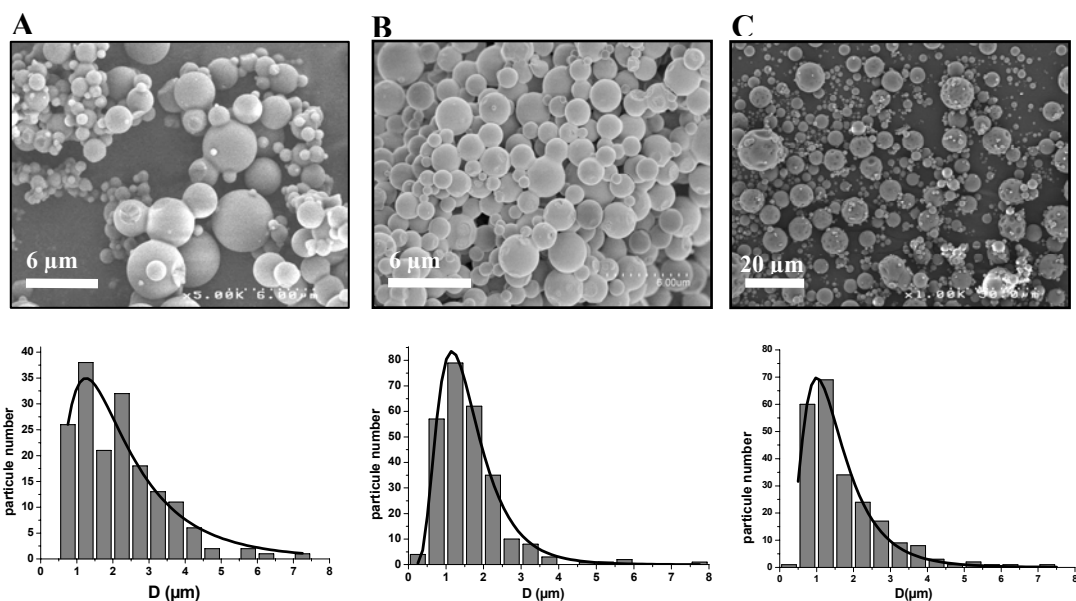

**ESI 3.** Variation of  $d_{corr}$  as a function of  $r_{ibu/tw}$ .

Variation of the correlation distance  $d_{corr}$  obtained from SAXS data (0.2 - 2 nm<sup>-1</sup>  $q$  range) as a function of the molar ratio ibuprofen/tween  $r_{ibu/tw}$ .

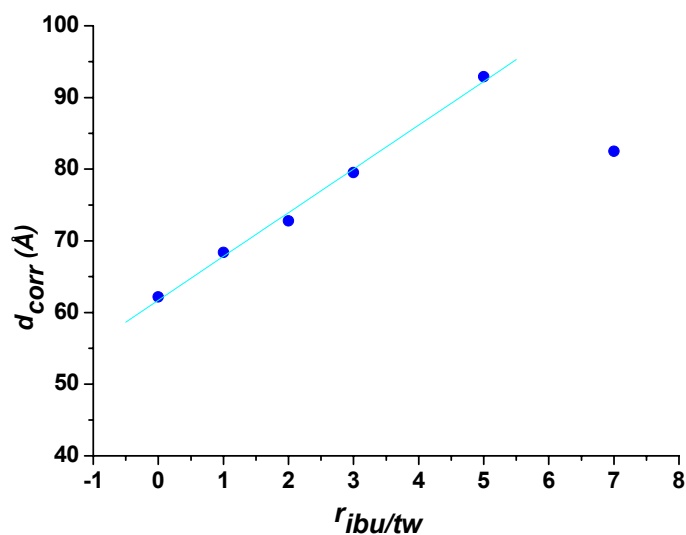

#### ESI 4. TEM analysis.

Example of a statistical analyses of sizes of domains at the core of the microspheres for sample **B** and **C**. (a) TEM micrograph of samples **B**. (b) Related size distributions obtained by counting the number of visible clear spheroids from one side of the particle to the other side.

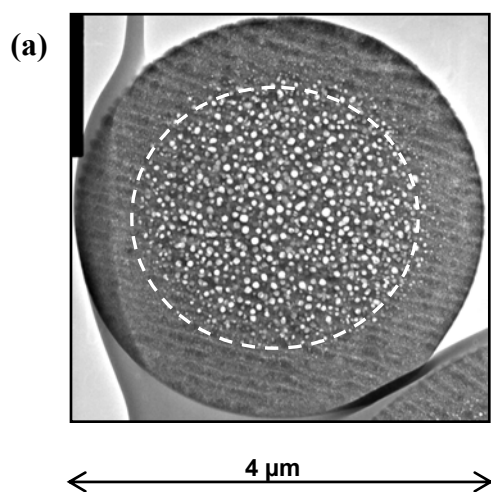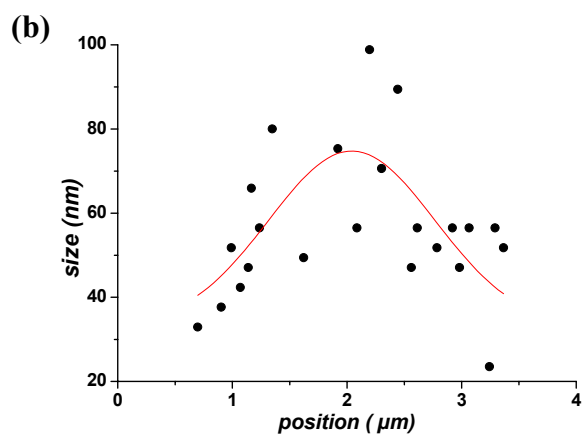

Supplement: b9nj00773c.pdf [file b9nj00773c.pdf]
